# Supplementary material
Source: PubMed Central journal article supplement (PMC3616538)

## Legends to Supplementary Figures

**Figure S1:** Target knockdown activity and nuclease stability of siHes5. **(a)** siHes5-mediated dose-dependent knockdown of guinea pig Hes5 mRNA exogenously stably expressed in HeLa cells. **(b)** siHes5-mediated dose-dependent knockdown of chinchilla Hes5 mRNA exogenously stably expressed in HeLa cells. **(c)** siHes5-mediated dose-dependent knockdown of mouse Hes5 mRNA exogenously stably expressed in Rat1 cells. **(d)** siHes5-mediated dose-dependent knockdown of human Hes5 mRNA exogenously stably expressed in RAT1 cells. All knockdown experiments were repeated twice and results are presented as mean residual amount of Hes5 mRNA  $\pm$  SD.

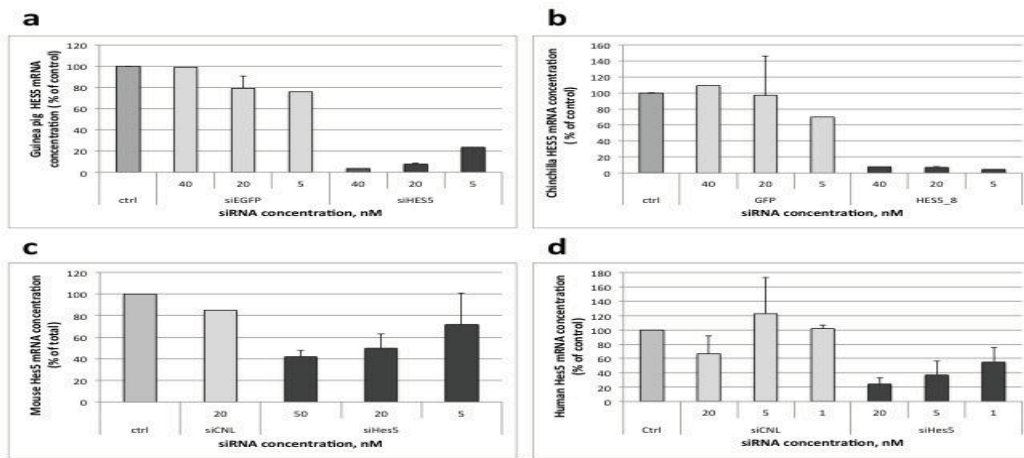

**Figure S2:** Analysis of siHes5 integrity on native 15% polyacrylamide gel following incubation at 37°C in rat cerebrospinal fluid for the indicated periods of time: 1, 3, 8 or 24 hours. '0' time-point corresponds to non-treated siRNA aliquot dissolved in PBS (size control).

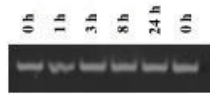

Supplement: mt201318x1.pdf [file mt201318x1.pdf]
